# Supplementary material
Source: publisher site journal article supplement (https://www.dovepress.com/article/supplementary_file/627971/627971%20Supplementary%20Tables.docx)
Supplement: Supplementary file 1 [file 627971%20Supplementary%20Tables.docx]

Supplementary Table 1. The top 10 co-cited journals.

| Rank | Journal | TCs | Country | IF 2023 | JCR 2023 |
| --- | --- | --- | --- | --- | --- |
| 1 | Hepatology | 3435 | USA | 12.9 | Q1 |
| 2 | Journal of Hepatology | 2180 | Netherland | 26.8 | Q1 |
| 3 | Cancer Research | 1841 | USA | 12.5 | Q1 |
| 4 | Cell | 1631 | USA | 45.6 | Q1 |
| 5 | Nature | 1580 | England | 50.5 | Q1 |
| 6 | Gastroenterology | 1468 | USA | 26.3 | Q1 |
| 7 | Journal of Biological Chemistry | 1287 | USA | 4.0 | Q2 |
| 8 | PROCEEDINGS OF THE NATIONAL ACADEMY OF SCIENCES OF THE UNITED STATES OF AMERICA | 1245 | USA | 9.4 | Q1 |
| 9 | Cell Metabolism | 1149 | USA | 27.7 | Q1 |
| 10 | Nature Communications | 1134 | England | 14.7 | Q1 |

TCs: total citations.

Supplementary Table 2. The top 10 cited manuscripts.

| Rank | Title | Journal | Type | Publication year | TCs |
| --- | --- | --- | --- | --- | --- |
| 1 | Frequent Mutation of Isocitrate Dehydrogenase (IDH)1 and IDH2 in Cholangiocarcinoma Identified Through Broad-Based Tumor Genotyping | Oncologist | Article | 2012 | 589 |
| 2 | Integrated Proteogenomic Characterization of HBV-Related Hepatocellular Carcinoma | Cell | Article | 2019 | 549 |
| 3 | Increased Lipogenesis, Induced by AKT-mTORC1-RPS6 Signaling, Promotes Development of Human Hepatocellular Carcinoma | Gastroenterology | Article | 2011 | 448 |
| 4 | S-adenosylmethionine in Liver Health, Injury, and Cancer | Physiological Reviews | Review | 2012 | 396 |
| 5 | Emerging roles and the regulation of aerobic glycolysis in hepatocellular carcinoma | Journal of Experimental & Clinical Cancer Research | Review | 2020 | 337 |
| 6 | Hexokinase-2 depletion inhibits glycolysis and induces oxidative phosphorylation in hepatocellular carcinoma and sensitizes to metformin | Nature Communications | Article | 2018 | 326 |
| 7 | The immunological and metabolic landscape in primary and metastatic liver cancer | Nature Reviews Cancer | Review | 2021 | 285 |
| 8 | GLUT1 Expression Is Increased in Hepatocellular Carcinoma and Promotes Tumorigenesis | American Journal of Pathology | Article | 2009 | 280 |
| 9 | Identification of anticancer drugs for hepatocellular carcinoma through personalized genome‐scale metabolic modeling | Molecular Systems Biology | Article | 2014 | 270 |
| 10 | p62/Sqstm1 promotes malignancy of HCV-positive hepatocellular carcinoma through Nrf2-dependent metabolic reprogramming | Nature Communications | Article | 2016 | 255 |

TCs: total citations.

Supplementary Table 3. The top 10 co-cited references.

| Rank | Title | Journal | Type | Publication  year | TCs |
| --- | --- | --- | --- | --- | --- |
| 1 | Global cancer statistics | CA: A Cancer Journal for Clinicians | article | 2011 | 177 |
| 2 | Hallmarks of cancer: the next generation | Cell | review | 2011 | 162 |
| 3 | Sorafenib in advanced hepatocellular carcinoma | New England Journal of Medicine | article | 2008 | 137 |
| 4 | Global Cancer Statistics 2020: GLOBOCAN Estimates of Incidence and Mortality Worldwide for 36 Cancers in 185 Countries | CA: A Cancer Journal for Clinicians | article | 2021 | 111 |
| 5 | Understanding the Warburg effect: the metabolic requirements of cell proliferation | Science | review | 2008 | 103 |
| 6 | Hepatocellular carcinoma | Nature Reviews Disease Primers | review | 2021 | 85 |
| 7 | The Emerging Hallmarks of Cancer Metabolism | Cell Metabolism | review | 2016 | 84 |
| 8 | Lenvatinib versus sorafenib in first-line treatment of patients with unresectable hepatocellular carcinoma: a randomised phase 3 non-inferiority trial | Lancet | article | 2018 | 76 |
| 9 | On the origin of cancer cells | Science | article | 1956 | 70 |
| 10 | Regorafenib for patients with hepatocellular carcinoma who progressed on sorafenib treatment (RESORCE): a randomised, double-blind, placebo-controlled, phase 3 trial | Lancet | article | 2017 | 68 |

TCs: total citations.

Supplementary Table 4. The top 20 keywords.

| Rank | Keyword | Counts | Rank | Keyword | Counts |
| --- | --- | --- | --- | --- | --- |
| 1 | hepatocellular carcinoma | 776 | 11 | prognosis | 95 |
| 2 | cancer | 404 | 12 | proliferation | 93 |
| 3 | expression | 320 | 13 | metastasis | 93 |
| 4 | metabolism | 184 | 14 | sorafenib | 84 |
| 5 | cells | 146 | 15 | glycolysis | 79 |
| 6 | growth | 145 | 16 | inhibition | 77 |
| 7 | liver cancer | 140 | 17 | survival | 75 |
| 8 | activation | 129 | 18 | progression | 74 |
| 9 | apoptosis | 109 | 19 | pathway | 72 |
| 10 | liver | 98 | 20 | metabolic reprogramming | 71 |
